# Supplementary material
Source: PubMed Central journal article supplement (PMC7522031)
Supplement: joces-133-243683-s1.pdf [file joces-133-243683-s1.pdf]

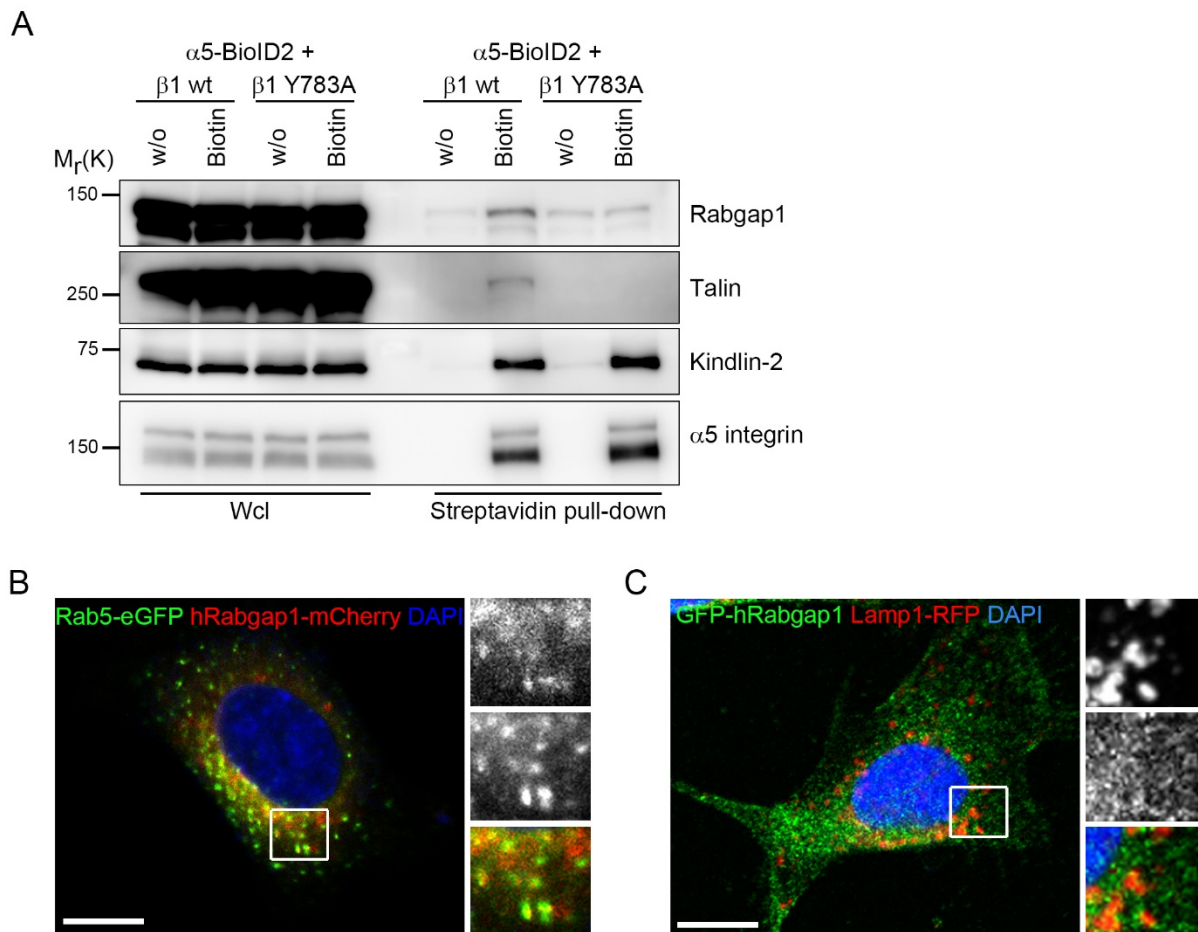

**Figure S1. Rabgap1 co-staining with EEA1 and Lamp1.** (A) Western blot analysis of proximity-biotinylation assays in wild-type or Y783A β1 integrin fibroblasts expressing α5 integrin fused to the promiscuous biotin ligase BioID2. Cells were left untreated (w/o) or incubated with 50 μM biotin for 16 hours before cell lysis and streptavidin bead pull-down. Wcl, whole cell lysate. (B,C) Confocal images of fibroblasts expressing Rabgap1-mCherry or GFP-hRabgap1 together with eGFP-tagged Rab5a (B) or RFP-tagged Lamp1 (C). DAPI (blue) was used to stain nuclei. Scale bars, 10 μm.

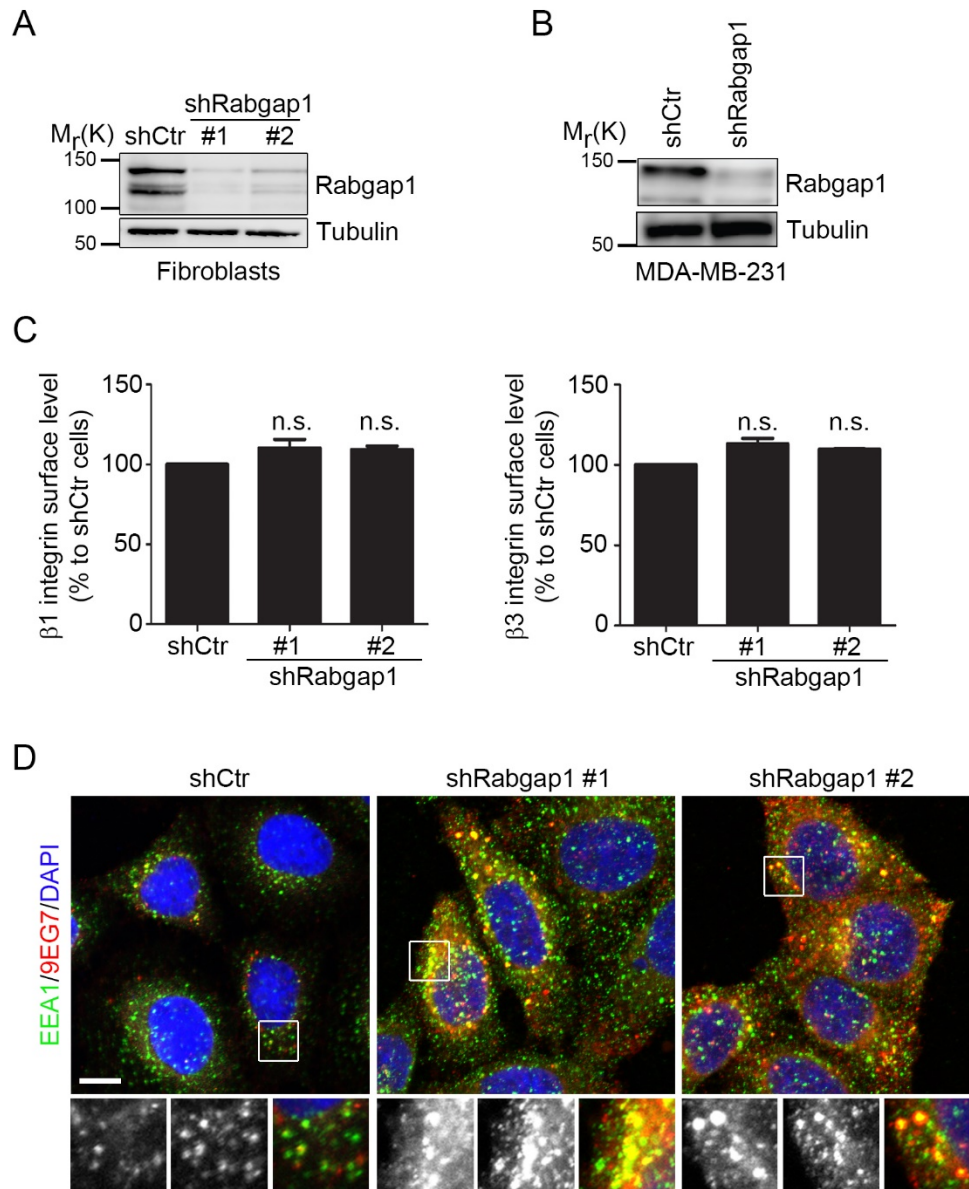

**Figure S2. Rabgap1 depletion does not affect β1 and β3 integrin surface level.** (A, B) Western blot analysis of control (shCtrl) and Rabgap1-depleted (shRabgap1) mouse fibroblasts (A) and MDA-MB-231 cells (B). Tubulin served as loading control. (C) Quantification of β1 and β3 integrin surface levels in control and Rabgap1-depleted fibroblasts determined by FACS. Data are mean±s.d.; *n*=3; n.s., not significant (unpaired *t*-test). (D) Confocal images of control (shCtrl) or Rabgap1-depleted (shRabgap1) fibroblasts after surface labeling of active β1 integrins (9EG7, red) at 4°C for 30 min followed by integrin internalization at 37°C for 30 min and the induction of integrin recycling. After an acid wash to remove antibody from the cell surface the cells were co-stained with an antibody against EEA1 (green). DAPI (blue) was used to stain nuclei. Scale bar: 10 μm.

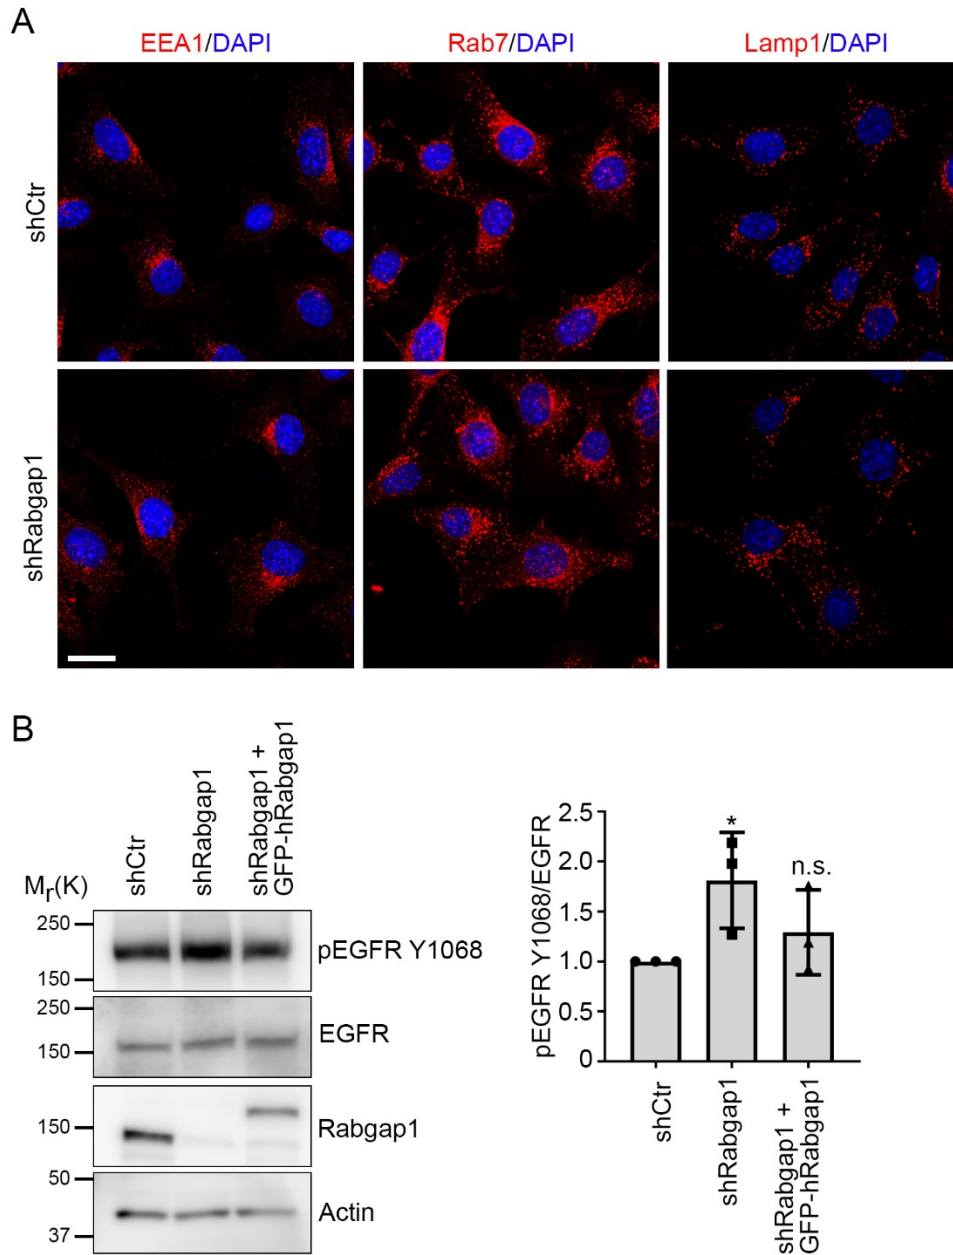

**Figure S3. Effect of Rabgap1-depletion on endosomal marker localization and EGFR activation.** (A) Confocal images of control (shCtr) and Rabgap1-depleted (shRabgap1) fibroblasts stained with antibodies against EEA1, Rab7 or Lamp1. DAPI (blue) was used to stain nuclei. Scale bar, 20  $\mu$ m. (B) Western blot and densitometric analysis of control (shCtr), Rabgap1-depleted (shRabgap1) and Rabgap1-depleted fibroblasts after re-expression of wild-type GFP-tagged Rabgap1 after starvation and EGF treatment for 10 min at 37°C. Data are mean  $\pm$ s.d.  $n=3$ ; \* $P<0.05$ ; n.s., not significant (unpaired  $t$ -test).

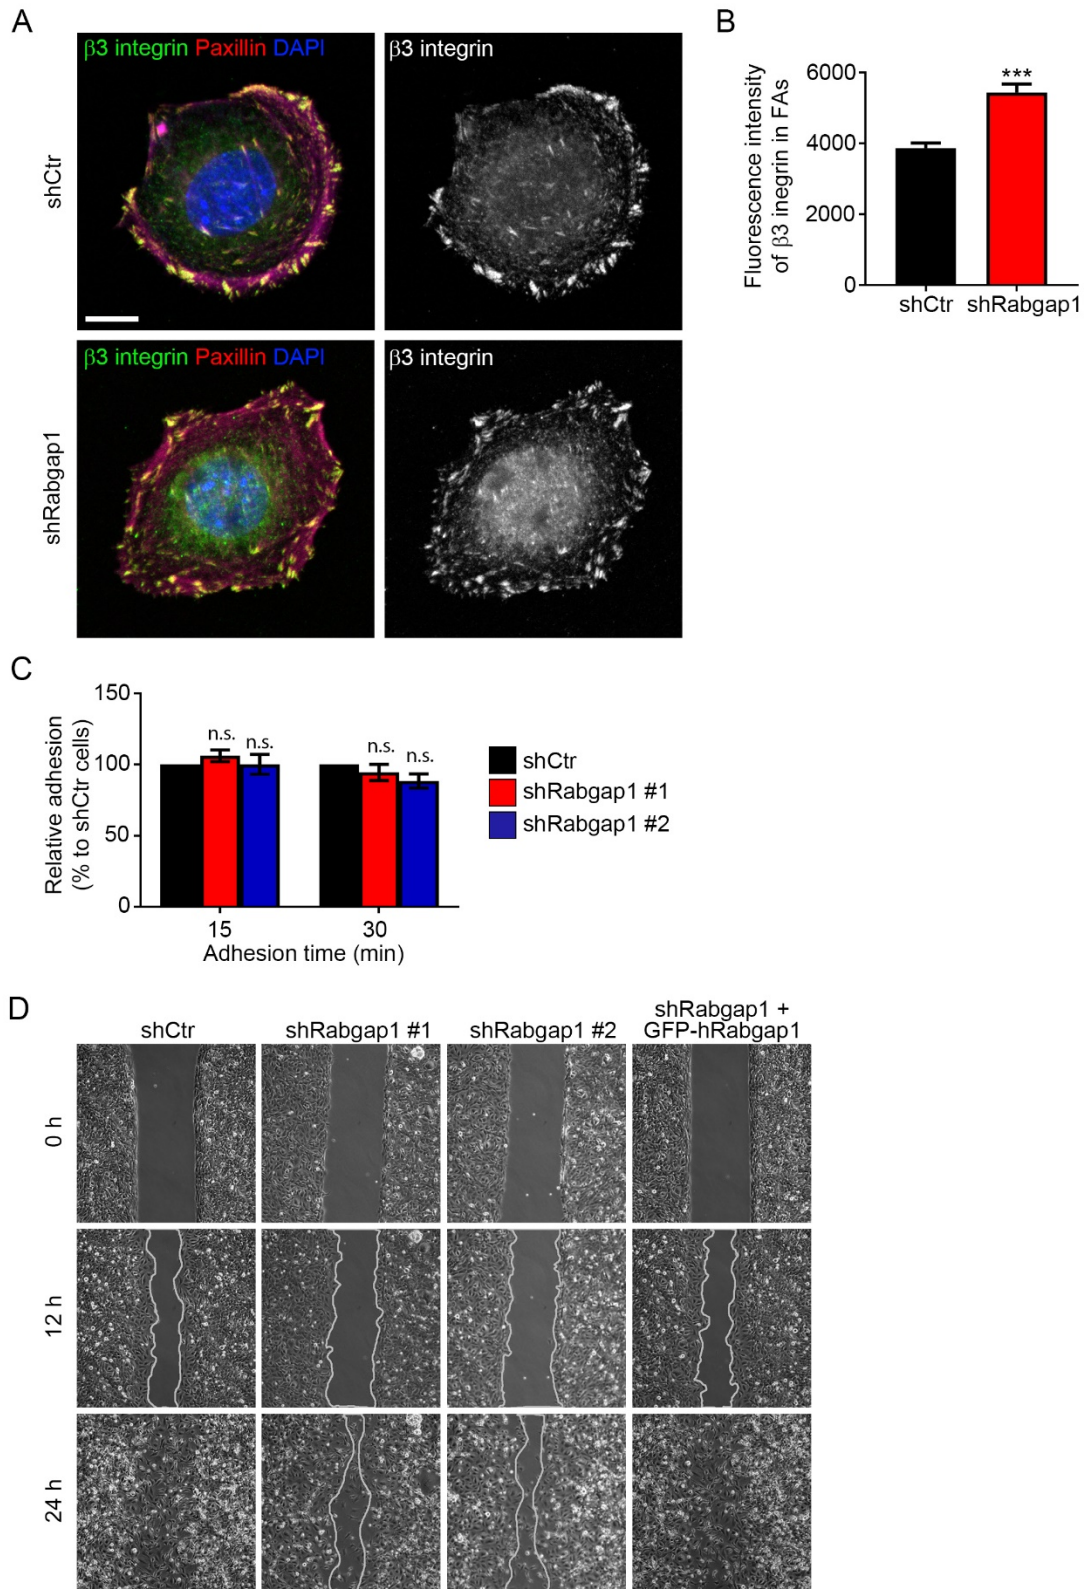

**Figure S4. Rabgap1 depletion increases  $\beta 3$  integrin levels in focal adhesions.** (A) Confocal microscopy images of control (shCtr) and Rabgap1-depleted (shRabgap1) mouse fibroblasts plated

for 90 min on fibronectin with antibodies against paxillin (red) and  $\beta 3$  integrin (green). DAPI (blue) was used to stain nuclei. Scale bar: 10  $\mu\text{m}$ . **(B)** Quantification of  $\beta 3$  integrin immunofluorescence intensity with Image J (integrate density) within the focal adhesions. Data are mean+s.e.m. of  $n=46$  cells; \*\*\* $P<0.0001$  (unpaired  $t$ -test). **(C)** Adhesion assay of control (shCtr) and Rabgap1-depleted (shRabgap1) fibroblasts on fibronectin substrates for 15 and 30 minutes. Data are mean $\pm$ s.e.m.  $n=5$ ; n.s., not significant (unpaired  $t$ -test). **(D)** Migration analysis of the indicated cell lines in a scratch wound assay. Pictures of representative wounds from time-lapse videos at the indicated times are shown.
